For submission to: *Applied and Environmental Microbiology*

**TITLE: Diversity of active viral infections within the *Sphagnum* microbiome**

Authors:

**Joshua M.A. Stough<sup>1\*</sup>, Max Kolton<sup>2</sup>, Joel E. Kostka<sup>2</sup>, David J. Weston<sup>3,4</sup>, Dale A. Pelletier<sup>3</sup>,  
and Steven W. Wilhelm<sup>1#</sup>**

Addresses:

<sup>1</sup> Department of Microbiology, University of Tennessee, Knoxville, Tennessee, United States of America 37996

<sup>2</sup> School of Biology and School of Earth and Atmospheric Sciences, Georgia Institute of Technology, Atlanta, GA, USA

<sup>3</sup> Biosciences Division, Oak Ridge National Laboratory, Oak Ridge, Tennessee, USA

<sup>4</sup> Climate Change Science Institute, Oak Ridge National Laboratory, Oak Ridge, Tennessee, USA

#Address correspondence to Steven W. Wilhelm: [wilhelm@utk.edu](mailto:wilhelm@utk.edu)

\*present address: Department of Microbiology & Immunology, University of Michigan, Ann Arbor 48109

Keywords: Viruses, RNA-seq, *Sphagnum*, Peat bogs, microbial ecology

## 1 **Abstract**

2 *Sphagnum*-dominated peatlands play an important role in global carbon storage and represent  
3 significant sources of economic and ecological value. While recent efforts to describe microbial  
4 diversity and metabolic potential of the *Sphagnum* microbiome have demonstrated the  
5 importance of its microbial community, little is known about the viral constituents. We used  
6 metatranscriptomics to describe the diversity and activity of viruses infecting microbes within  
7 the *Sphagnum* peat bog. The vegetative portions of 6 *Sphagnum* plants were obtained from a  
8 peatland in northern Minnesota and total RNA extracted and sequenced. Metatranscriptomes  
9 were assembled and contigs screened for the presence of conserved virus marker genes. Using  
10 bacteriophage capsid protein, gp23, as a marker for phage diversity, we identified 33 contigs  
11 representing undocumented phage s that were active in the community at the time of sampling.  
12 Similarly, RNA-dependent RNA polymerase and the Nucleo-Cytoplasmic Large DNA Virus  
13 (NCLDV) major capsid protein were used as markers for ssRNA viruses and NCLDV,  
14 respectively. In total 114 contigs were identified as originating from undescribed ssRNA viruses,  
15 22 of which represent near-complete genomes. An additional 64 contigs were identified as being  
16 from NCLDVs. Finally, 7 contigs were identified as putative viroplasm or poliovirus-like viruses.  
17 We developed co-occurrence networks with these markers in relation to the expression of  
18 potential-host housekeeping gene *rpb1* to predict virus-host relationships, identifying 13 groups.  
19 Together, our approach offers new tools for the identification of virus diversity and interactions  
20 in understudied clades, and suggest viruses may play a considerable role in the ecology of the  
21 *Sphagnum* microbiome.

22

23 **Significance**

24 *Sphagnum*-dominated peatlands play an important role in maintaining atmospheric carbon  
25 dioxide levels by modifying conditions in the surrounding soil to favor its own growth over other  
26 plant species. This slows rates of decomposition and facilitates the accumulation of fixed carbon  
27 in the form of partially decomposed biomass. The unique environment produced by *Sphagnum*  
28 enriches for the growth of a diverse microbial consortia that benefit from and support the moss's  
29 growth, while also maintaining the hostile soil conditions. While a growing body of research has  
30 begun to characterize the microbial groups that colonize *Sphagnum*, little is currently known  
31 about the ecological factors that constrain community structure and define ecosystem function.  
32 Top-down population control by viruses is almost completely undescribed. This study provides  
33 insight into the significant viral influence on the *Sphagnum* microbiome, and identifying new  
34 potential model systems to study virus-host interactions in the peatland ecosystem.

35

36

## 37 **Introduction**

38 Peatlands represent one of the most significant biological carbon sinks on the planet,  
39 storing an estimated 25% of terrestrial carbon in the form of partially decomposed organic matter  
40 (1-3). This accumulation of carbon is achieved through much slower rates of respiration and  
41 decomposition than observed in soil, due in large part to the low pH, nutrient-poor, and  
42 anaerobic environments created by the dominant moss population (4, 5), of which the genus  
43 *Sphagnum* is most prevalent (6, 7). As these environmental conditions appear to favor the growth  
44 of *Sphagnum* over vascular plants, primary production is dominated by the moss, which further  
45 retards decomposition due to production of antimicrobial compounds such as sphaginic acid (8-  
46 10) and sphagnan (11, 12). Despite this, *Sphagnum* and other peat mosses cultivate a diverse,  
47 symbiotic microbiome that appears to abate nutritional gaps for the moss and also contribute to  
48 the unique biogeochemical characteristics of the peatland ecosystem (13-15). In addition to their  
49 value as reservoirs of microbial diversity, the partially decomposed organic matter, known as  
50 *Sphagnum* peat, serves as an important economic resource for use in horticulture. As many peat  
51 bogs have begun to experience stress due to anthropogenic disturbances (16-18) and possibly  
52 climate change (19), the *Sphagnum* microbiome is of interest in peatland conservation and the  
53 ecosystem's services to the surrounding environment.

54 While there is a growing body of research characterizing the microbial groups that  
55 colonize *Sphagnum* (15), little is currently known about the ecological factors that define  
56 community structure and ecosystem function. Studies suggest that subtle differences in pH and  
57 available nutrients, manipulated by different *Sphagnum* species and strains, create distinct  
58 microbial consortia (14, 20, 21). Other observations suggest a more homogenous community  
59 (22), highlighting a need for further study. Culture-dependent experiments isolating endophytic

60 bacteria indicate *Sphagnum* cultivates symbionts with abilities that include antifungal activity  
61 (20, 23) and nitrogen fixation (14), and that these microbiomes may be passed vertically to the  
62 moss progeny (21). Yet while examinations of how environmental conditions and host-microbe  
63 symbiotic interactions shape the structure and function of microbial communities, the influence  
64 of virus populations on the *Sphagnum* microbiome remains unexplored.

65 Viruses are the most abundant biological entities on Earth, and central to global  
66 ecosystems as they can drive the host evolution through predator-prey interactions and horizontal  
67 gene transfer (24). Moreover, viruses can lyse single-celled primary producers and heterotrophs,  
68 releasing nutrient elements from the biomass of prokaryotes and eukaryotic protists (25, 26).  
69 Viruses may also act as a top-down control on the composition and evenness of microbial  
70 communities, targeting hosts that reach higher cell densities, a phenomenon referred to as the  
71 “*kill-the-winner*” model (27).

72 As lab studies of viruses require hosts that can be grown in culture, many  
73 environmentally relevant viruses are poorly understood and their representation in reference  
74 databases is often skewed. Previous efforts to describe environmental viromes have focused  
75 primarily on the sequencing of shotgun or PCR-targeted metagenomes. While these methods  
76 have proven powerful, rapidly expanding available reference material for bacteriophage (28, 29),  
77 it leaves the considerable diversity of RNA viruses largely untapped (30). Moreover, the  
78 common approach of selecting for viruses based on size-exclusion with filters removes many of  
79 the Nucleo-Cytoplasmic Large DNA Viruses (NCLDVs, or commonly “giant viruses”) that are  
80 also environmentally relevant and phylogenetically informative (31, 32). Metagenomic  
81 sequencing also limits observations to virus particles: from these data inferences on viral activity  
82 require tenuous assumptions. The advent of high-throughput RNA sequencing offers viral

83 ecologists the opportunity to study active infections in the environment, as DNA viruses only  
84 produce transcripts inside a host. Moreover, this approach also captures fragments of RNA virus  
85 genomes. When sequencing is of sufficient depth and multiple samples are collected with spatial  
86 and temporal variability, these data present an opportunity to develop hypothetical relationships  
87 between virus and host markers (33) for subsequent in lab testing.

88         In this study, we analyzed metatranscriptomes from the microbial community inhabiting  
89 the vegetative portion of *Sphagnum fallax* and *S. magellanicum* plants in Northern Minnesota,  
90 with the goal of describing active viral infections within the *Sphagnum* microbiome. Using  
91 marker genes conserved within several viral taxa, we identified an active and diverse  
92 bacteriophage population, largely undescribed in previous studies. We also identified ongoing  
93 infections by a diverse consortium of “giant” viruses and potentially corresponding  
94 viroplasm/polyoma-like viruses (hereafter referred to as viroplasm), including several giant  
95 viruses closely related to the recently discovered Klosneuviruses (34). Finally, a number of novel  
96 positive-sense single-stranded RNA viruses, some of which assembled into near complete  
97 genomes, were observed. With this information in hand we developed statistical network  
98 analyses, correlating co-expression of viral marker genes with housekeeping transcripts from  
99 potential hosts. The resulting observations propose several virus-host pairings that, moving  
100 forward, can be tested in a laboratory setting. Together, these results demonstrate new potential  
101 model systems to study virus-host interactions in the peat bog ecosystem, and provide insight  
102 into the significant viral influence on the *Sphagnum* microbiome.

103

## 104 **Results**

105 *Identification of resident phage populations*

106 To identify active virus populations in the *Sphagnum* phyllosphere, we obtained *S. fallax*  
107 and *S. magellanicum* plant matter samples (3 from each species) from peatland terrariums as a  
108 part of the Spruce and Peatlands Under Changing Environments (SPRUCE) project for  
109 metatranscriptomic sequencing. Across all six *Sphagnum* phyllosphere samples, 33 contigs were  
110 identified as transcripts encoding major capsid protein (*gp23*) originating from bacteriophage,  
111 while only 6 contigs were identified using three other marker genes. Concurrent with this, more  
112 reads mapped to *gp23* contigs than to the other marker genes combined, the most abundant of  
113 which were three ribonucleotide reductase contigs.

114 Of the 33 contigs, 18 were assigned to the *Eucampyvirinae* subfamily with  
115 *Campylobacter* viruses CP220 and PC18, while the rest were spread amongst the other Myovirus  
116 taxa, predominantly the *Tevenvirinae* (Fig 1). SS4 contig 77559 was the most abundant, with  
117 consistently high expression across all samples, whereas other contigs dominated just one or two  
118 samples. Of the 6 contigs identified using the other 3 viral marker genes, one was identified as a  
119 potential *gp20* homologue, originating within *Myoviridae* with *Clostridium* virus phiCD119 as  
120 the closest relative (SFig 1). Two contigs were identified as *recA* contigs, likely originating in  
121 myovirus and siphovirus relatives (SFig 2), while the remaining three contigs were identified as  
122 ribonucleotide reductase transcripts (SFig 3).

123

124 *Single-stranded RNA virus diversity and abundance*

125 Within our samples, 114 contigs originated from RNA viruses, the majority of which  
126 belonged to the currently unassigned *Barnaviridae* and Astrovirus-like families (Fig 2).

127 Additionally, a large number of *Picornaviruses* were observed, most of which were closely  
128 related to the unclassified marine *Aurantiochytrium* single-stranded RNA virus, and *Secoviridae*  
129 plant viruses. Lastly, several contigs were closely related to the *Nidovirales* clade, which  
130 generally infect animal species.

131         Among these, 22 contigs were found to be near complete ssRNA virus genomes (based  
132 on gene content and size), encoding multiple viral genes in addition to RDRP. Gene regions were  
133 identified and annotated using the NCBI conserved domain and Pfam HMM search tools, and  
134 the full-length RDRP sequence was used to construct a maximum likelihood phylogenetic tree  
135 (Fig 3). Of the partial ssRNA genomes that were assembled, 2 were missing the conserved R<sub>h</sub>v  
136 structural genes, while one was missing a RNA virus Helicase. The majority of these contigs fall  
137 under the *Picornavirales* order, which also included the most complete viral genomes. As was  
138 observed with the shorter RDRP contigs above, most of the *Picornavirales* contigs were most  
139 closely related to the unclassified marine species, or members of the family *Secoviridae* clade,  
140 whose membership includes the Parsnip yellow fleck virus. A number of partial *Picornavirus*  
141 genomes were also identified as members of the family *Dicistroviridae*. Outside the  
142 *Picornavirales*, most contigs clustered closely with the unassigned Astrovirus-like *Phytophthora*  
143 *infestans* RNA virus. To determine the relative abundance of different RNA virus genomes in the  
144 peat bog samples, we mapped reads back to contigs and calculated transcripts per million (TPM)  
145 values to account for contig length and library size. The most abundant contig across all samples  
146 was SS4 contig 3964, which was most closely related to the Rotifer birnavirus. All other contigs  
147 appear to be abundant prominently in one or two samples, and absent or in low abundance in the  
148 others, with no patterns of abundance apparent.

149 *Giant viruses and viroplage in Sphagnum microbiome*



150           Of the 10 gene markers tested to identify Nucleo-Cytoplasmic Large DNA Viruses  
151 (NCLDVs), only the giant virus major capsid protein (MCP) was detected in the  
152 metatranscriptome. 64 contigs were observed with homology to MCP, representing every known  
153 group of NCLDVs (Fig 4). Out of the 64 MCP contigs, 46 were placed within the *Mimiviridae*  
154 taxa. Most contigs (25) closely aligned with the recently discovered Klosneuviruses, with the  
155 Indivirus and Catovirus representing the most diversity in these samples. The next most abundant  
156 group were the “extended *Mimiviridae*” (7 contigs), species with known similarity to  
157 Mimiviruses but that infect eukaryotic algae. Six contigs phylogenetically were similar to the  
158 *Asfarviridae*, here represented by the African swine fever Virus. Potential relatives of the giant  
159 virus outliers, Pandoravirus and Pithovirus, were not observed (due to methodological  
160 limitations), and the *Iridoviridae* were poorly represented (1 contig). Using the virophage MCP  
161 and packaging ATPase as markers, we identified 7 contigs as transcripts originating in putative  
162 virophage or polinton-like viruses, all of which were phylogenetically placed amongst isolates  
163 identified from freshwater ecosystems (Fig 5).

164           As was observed with the other major viral taxa described, the majority of contigs were  
165 most abundantly expressed in one or two samples and present at very low levels in the rest. The  
166 most abundant NCLDV-MCP contig in the samples was SS2 contig 73240, most closely related  
167 to *Megavirus chilensis*, which was the most highly expressed giant virus contig across all  
168 samples. Four other contigs (SS6 contig 110585, SS4 contigs 55722 and 141177, and SS5 contig  
169 119519) were highly expressed across all six samples.

#### 170 *Prediction of virus-host pairs*

171           By comparing and correlating expression of virus marker genes to *rpb1* expression from  
172 cellular organisms, we endeavored to predict potential virus-host groups in the *Sphagnum*

173 phyllosphere. Fig 6 shows statistically robust networks containing at least one virus and one host,  
174 where co-occurrence and correlation were observed in more than one sample. A total of 13 virus-  
175 host groups were detected, spread across the major viral taxa detected in this dataset. We note  
176 that no networks containing the virophage/polinton-like viruses emerged. Four relationships  
177 were predicted from bacteriophage *gp23* abundance, the simplest of which was a *Tevenvirinae*  
178 phage-*Metazoa-Rhizaria* group with moderate correlations (Fig 6a). The other 3 relationships are  
179 more complicated, containing multiple potential hosts and, for the largest predicted group,  
180 multiple virus transcripts. The majority of potential hosts in these groups were identified as  
181 eukaryotic, with only one putative bacterium and two archaea. Correlation coefficients for the  
182 phage-prokaryote clusters were lower than was observed in the other major viral taxa, with low  
183 to moderate correlations between viruses and bacteria.

184 We observed 4 predicted RNA virus-host clusters, all of which contained multiple hosts  
185 grouped with a single virus (Fig 6b). Most of the predicted hosts appear closely related to  
186 eukaryotic single-celled protists, within the *Excavata* and *Rhizaria* supergroups. Correlation  
187 coefficients observed in these relationships are generally higher than observed in the phage-host  
188 clusters. The 5 predicted NCLDV-host clusters (Fig 6c) were the most highly correlated and  
189 complex. Predicted hosts were highly varied, ranging from diatoms to animals, though all virus  
190 members were placed either within *Mimiviridae* or the extended Mimivirus group. MCP contigs  
191 originating in close relatives of the recently discovered Klosneuviruses are present in both the 7-  
192 and 10-member clusters, in addition to a pair of contigs most closely related to *Aureococcus*  
193 *anophagefferens* Virus (AaV). An additional 15 statistically significant clusters across all three  
194 viral taxa were observed where the virus and host were present in only one sample (not shown).

195

## 196 **Discussion**

197           Understanding the virus burden on microbial communities in ecologically-rich  
198 ecosystems is an important step forward in resolving their function and predicting how they  
199 might respond to various drivers of ecosystem scale change. In the present study we used  
200 metatranscriptomes to describe the diversity and activity of the resident virus populations in a  
201 peat moss (*Sphagnum*) microbiome. We identified previously undescribed virus activity from  
202 multiple taxa, most of which are poorly represented in either the literature or reference sequence  
203 databases. We used read mapping to quantify the relative abundance of active viral infections.  
204 Lastly, we compared expression of viral transcripts to that of potential hosts, using a correlation  
205 co-occurrence networks approach (33) to predict putative hosts for the observed virus  
206 populations. Together, our results suggest that the *Sphagnum* phyllosphere represents a  
207 significant and largely untapped source of virus diversity and activity. Viruses were highly active  
208 across all samples, with some individual viruses exhibiting abundant activity in single samples,  
209 while others were more pervasive. Given that our observations were based on RNA sequencing  
210 data, they do not represent a full accounting of the virus particles present in the community.  
211 However, metatranscriptomic data, allows us to distinguish virus populations active at the time  
212 of sampling. In addition, as viruses only transcribe their genes during infection, virus and host  
213 transcripts are expected to co-occur, and it is possible that the abundance of transcripts (at least  
214 for DNA viruses) could be used to predict natural hosts of viruses observed in the ecosystem  
215 which can be tested in a laboratory or field setting. Ultimately, this study identifies from within a  
216 complex community a number of candidate virus-host model systems for future study.

217 *Viral diversity and activity in Sphagnum plants*

218           As viruses lack a universal genetic marker like the bacterial 16S rRNA gene, we opted to  
219 screen metatranscriptome assemblies for genes previously demonstrated to be largely or wholly  
220 conserved amongst individual viral taxa. Within the expanded and diverse genetic potential of  
221 giant viruses, only a handful of genes are currently conserved amongst all members (32, 35) and  
222 these, in addition to several markers conserved amongst a large portion of giant viruses were  
223 used to identify activity in the *Sphagnum* phyllosphere. Out of the 10 genes used to screen the  
224 metatranscriptomes, we only MCP transcripts. This is not surprising given the number of capsid  
225 proteins needed for viral assembly: indeed this transcriptional pattern was previously observed in  
226 both cultures (36) and marine systems by Moniruzzaman *et al.* (2017). It should be noted that the  
227 RNA-seq dataset used in those studies was poly-A selected, enriching for eukaryotic transcripts,  
228 and thus coverage of eukaryotic virus gene expression would be much higher than in the  
229 *Sphagnum* metatranscriptome. That we observed MCP expression in abundance suggests a  
230 significant number of infections occurred at the time of sampling. While the magnitude of giant  
231 virus diversity in *Sphagnum* dominated ecosystems is, to our knowledge, completely unexplored,  
232 the richness observed here is considerably larger than expected compared to better documented  
233 systems. 64 distinct MCP genotypes were identified in the *Sphagnum* phyllosphere  
234 metatranscriptomes, which is high when compared to one recent survey that identified 30 novel  
235 MCP transcripts from multiple environmental datasets (37), and another which observed 107  
236 NCLDV sequences in 16 publicly available environmental metagenomes of comparable  
237 sequencing depth isolated from different ecosystems (38). Most of the MCP contigs identified  
238 were placed in clusters around a small number of virus relatives, highlighting the under-sampled  
239 diversity of giant viruses in the literature, poor representation in reference databases, and the  
240 considerable diversity present in *Sphagnum* peat bogs. The significant giant virus diversity

241 observed here implies a corresponding eukaryotic richness that is also under-described (39).  
242 Additionally, a series of virophage transcripts were detected, indicating a significant response to  
243 infections by giant viruses in the system. Many of these are phylogenetically grouped with the  
244 polintoviruses, transposable elements that produce virion particles that can exploit the replication  
245 machinery of actively infecting giant viruses to reproduce, often at the expense of the giant (40,  
246 41). These observations suggest that while an active picoeukaryotic population may persist,  
247 mortality mechanisms beyond grazer-driven losses are at play and likely important to carbon  
248 flow in the system.

249         The use of RNA-seq presents a unique opportunity to capture the genomic material of  
250 RNA viruses that is lost in metagenomic sequencing. As such, RNA virus representation in  
251 sequencing databases and the literature is largely constrained to culture-based studies. All known  
252 RNA viruses require a functional RNA-dependent RNA polymerase (RdRP) to copy their  
253 genome inside the host cell, a function exclusive to viruses, making it a highly specific marker  
254 for RNA virus discovery (42, 43). Recent attempts to use metatranscriptomes to describe  
255 environmental RNA viruses have proven successful, not only identifying marker gene fragments  
256 in datasets, but assembling complete and near-complete genomes (33, 43). The diversity and  
257 composition of RNA virus populations in *Sphagnum* peatlands is largely unknown: it is currently  
258 limited to the small group of RNA-DNA hybrid chimeric Cruciviruses (44). Here, as was  
259 observed with the giant viruses, most RNA virus contigs were placed in clusters with a single  
260 represented species, suggesting a significant degree of uncharacterized diversity. This is not  
261 entirely surprising, as RNA viruses are expected to make up as much as half of the virus particles  
262 in the Earth's oceans, and yet they are almost as poorly understood and represented in  
263 sequencing databases as giant viruses (30). Similarly, we assembled and identified 22 near-

264 complete RNA virus genomes, where completeness was determined primarily by size and the  
265 presence of the 6 core genes. As there are currently only 265 sequenced genomes within the  
266 *Picornavirales*, most of which grouped within the *Picornaviridae*, this represents a sizeable  
267 addition to the known diversity of ssRNA viruses. This is especially true for the unassigned and  
268 unclassified taxa, and establishes a strong foundation for future efforts to describe RNA virus  
269 populations in *Sphagnum*.

270 Description of bacteriophage populations in *Sphagnum* peatlands is currently limited to  
271 the ssDNA viruses of the *Microviridae* (45) and *Caudovirales* (46) observed in metagenomics  
272 data, though it appears that phage are the most abundant biological entities in the *Sphagnum*  
273 phyllosphere (46). Given this, and the dominance of bacteria in the *Sphagnum* microbiome as  
274 previously described (15), the relatively low abundance of active bacteriophage in our samples  
275 was a surprise. Marker genes to identify bacteriophage were chosen based on their conservation  
276 across phage taxa and their success in other environmental datasets. Gp20 (phage portal protein)  
277 and Gp23 (major capsid protein) have been shown previously to be highly conserved and  
278 effective for phylogenetic assignment of members of the *Myoviridae* (47-49). RecA is conserved  
279 across all three bacteriophage taxa and could illuminate lysogeny, and ribonucleotide reductase  
280 (RNR) has been used as an effective marker for screening novel viruses from marine sequencing  
281 datasets (50). As such, we identified 39 bacteriophage contigs using these markers, 33 of which  
282 were from Gp23. This may represent a similar phenomenon as MCP in the giant viruses above,  
283 where transcripts encoding structural proteins are much more abundant than other genes and  
284 sequencing lacked the depth to detect them. For the purpose of discovering novel phage species,  
285 DNA sequencing through metagenomics may prove more successful.

286 *Virus-host predictions*

287 Future study of viral dynamics in peatlands will require the establishment of model  
288 virus/host pairs for *in vitro* experimentation and *in situ* tracking. While culture-based techniques  
289 can yield model systems, it is not always clear whether the isolated organisms are  
290 environmentally relevant. In order to address this, we attempted to use statistical methods to  
291 propose virus/host pairs as potential future model systems based on their cooccurrence in  
292 samples and the correlation of their abundance. As viruses produce transcripts only when  
293 actively infecting a host, positive correlation and co-occurrence between virus and host  
294 transcripts is expected, and might be used to predict host-virus relationships, provided an  
295 appropriate transcriptional proxy for growth and activity is available (33). In this study, we used  
296 the eukaryotic RNA-polymerase gene *rpb1* as a marker for abundance and activity in potential  
297 hosts, as it is conserved amongst all eukaryotic organisms, is phylogenetically informative, and  
298 has been previously described as one of the more consistently expressed eukaryotic genes in  
299 marine systems, scaling well with the activity of the organism (51), though the stability of its  
300 expression has not been evaluated in terrestrial ecosystems. We used NCLDV MCP abundance  
301 as a proxy for giant virus production, Gp23 for phage production, as transcription is necessary  
302 for the assembly of new virus particles and transcript abundance in some appears to be closely  
303 linked to viral replication. We also used RdRP as a proxy for RNA virus production,  
304 acknowledging the caveat that we cannot distinguish between abundance of free virus particles  
305 and active infections (33).

306 Correlation and co-occurrence matrices, clustered into groups by similarity and tested  
307 with the SIMPROF permutation test, yielded 13 predicted groups of viruses and hosts. For  
308 ssRNA and giant viruses, several of the networks produced in the analysis included multiple  
309 bacterial and archaeal sequences picked up in the RNA polymerase screen. As we have no reason

310 to believe bacterial species are infected by NCLDVs or Picornaviruses, it is likely these  
311 predictions represent a confounding relationship between prokaryotes and potential eukaryotic  
312 hosts, observed in network analyses for all three viral taxa described here, where a beneficial  
313 interaction results in an indirect correlation with viral infection. Indeed, previous use of this  
314 method in marine systems showed a similar phenomenon, where an algal Mimivirus and a  
315 known host were grouped with a fungal species and another virus (33). Even after the  
316 consideration of bacterial species within the predicted groups, some remain complicated with  
317 multiple viruses and potential eukaryotic hosts, which may be explained by a broader host range  
318 amongst giant viruses enabled by the expansion of genetic material and increased independence  
319 from host machinery. Similar relationships were observed amongst RNA viruses, though these  
320 are more tenuous, as we are unable to distinguish whether sequencing reads originated transcripts  
321 or genomic material.

322 All together, we have identified a considerable amount of viral diversity from several  
323 major viral taxa active within a poorly understood microbial ecosystem. As they were identified  
324 from transcript sequencing data, the viruses described here likely only represent a fraction of the  
325 whole virus community, which may be elucidated through further culture-independent work. We  
326 have also used transcript abundance within a statistical framework to predict several host-virus  
327 relationships which can be sought out and tested in culture. These results establish an important  
328 and much needed foundation for future research into the microbial ecology in *Sphagnum* peat  
329 bogs.

330

## 331 **Materials and Methods**



332 *Sample collection and Survey of Environmental Conditions*

333           TriPLICATE individual plants of *Sphagnum magellanicum* and *Sphagnum fallax* were  
334 collected on August 2015 from the SPRUCE experiment site at the S1 bog on the Marcell  
335 Experimental Forest (U.S. Forest Service, <http://mnspruce.ornl.gov/>). The S1 Bog is an acidic  
336 and nutrient-deficient ombrotrophic *Sphagnum*-dominated peatland bog (surface pH $\leq$ 4.0) located  
337 approximately 40 km north of Grand Rapids, Minnesota, USA (47°30.476' N; 93°27.162' W; 418  
338 m above mean sea level) (52-54). To characterize the *Sphagnum* virome, *Sphagnum* samples  
339 were collected as previously described (54). Only green living plants were sampled: samples  
340 focused on the capitulum plus about 2-3 cm of green living stem. B *Sphagnum* stems  
341 (phyllosphere) were cleaned from unrelated plant debris, and frozen immediately on dry ice.  
342 Frozen samples were overnight shipped to the Georgia Institute of Technology for RNA  
343 extraction.

344

345 *RNA Extraction and Sequencing*

346 One gram of *Sphagnum* phyllosphere tissue was ground with a mortar and pestle under liquid  
347 nitrogen. The fine powder was transferred to 10 extraction tubes and total RNA isolated using the  
348 PowerPlant RNA Isolation Kit with DNase according to the manufacturer's protocol (MoBio  
349 Laboratories, Carlsbad, CA, USA). DNA-depleted RNA was quantified using the Qubit RNA HS  
350 Assay Kit (Invitrogen, Carlsbad, CA, USA) and quality was assessed on the Agilent 2100  
351 BioAnalyzer using the Agilent RNA 6000 Pico Kit (Agilent Technologies). Additionally, the  
352 absence of DNA contamination was confirmed by running a polymerase chain reaction using  
353 universal bacterial 16S rRNA primers 515F and 806R. Finally, RNA samples without detectible

354 DNA contamination and exhibiting an RNA integrity number (RIN) > 6 were pooled. Extracted  
355 total environmental RNA samples were sent on dry ice to the Joint Genome Institute (JGI)  
356 facilities for meta-transcriptomes libraries construction and sequencing. All protocols employed  
357 were standard JGI protocols Ribosomal RNA subtraction from total environmental RNA was  
358 completed using the Ribo-Zero rRNA Removal Kit (Illumina, San Diego, CA). rRNA depleted  
359 environmental RNA were used to construct paired end metatranscriptomes libraries using TruSeq  
360 kit and sequenced on the Illumina HiSeq2000 platform at the JGI facilities using a single-end  
361 250bp flow cell.

### 362 *RNA-seq Data Processing*

363 Raw sequences (see Supplementary Table 2) were downloaded from the Department of  
364 Energy Joint Genome Institute server and processed using the CLC Genomics Workbench v.  
365 10.0.1 (QIAGEN, Hilden, Germany). Reads below a 0.03 quality score cutoff were removed  
366 from subsequent analyses, and the remaining reads were trimmed of any ambiguous and low  
367 quality 5' bases. Samples were subjected to a subsequent *in silico* rRNA reduction using the  
368 SortmeRNA 2.0 software package (55). Filtered reads were *de novo* assembled with cutoffs of  
369 300 base minimum contig length and average coverage of 2, leaving a total of 705,526 contigs  
370 across all samples.

### 371 *Screening Assemblies for Marker Genes*

372 Marker genes to identify bacteriophage were chosen based on their conservation across  
373 phage taxa and their success in other environmental datasets. Gp20 (phage portal protein) and  
374 Gp23 (major capsid protein) have been shown previously to be highly conserved and effective  
375 for phylogenetic assignment of members of the *Myoviridae* (47-49). RecA is conserved across

376 all three bacteriophage taxa and could illuminate lysogeny, and ribonucleotide reductase (RNR)  
377 has been used as an effective marker for screening novel viruses from marine sequencing  
378 datasets (50). To identify contigs specific to the NucleoCytoplasmic Large DNA Virus  
379 (NCLDV) clade, contig libraries were screened for the presence of 10 genes previously identified  
380 as core NCLDV genes as previously described (33). Briefly, contig libraries were queried against  
381 Nucleo-Cytoplasmic Virus Orthologous Groups (NCVOG) protein databases for each of the  
382 following 10 marker genes in a Blastx search with a minimum e-value cutoff of  $10^{-3}$ : A32 virion  
383 packaging ATPase (NCVOG0249), VLFT-like transcription factor (NCVOG0262), Superfamily  
384 II Helicase II (NCVOG0024), mRNA capping enzyme (NCVOG1117), D5 helicase-primase  
385 (NCVOG0023), ribonucleotide reductase small subunit (NCVOG0276), RNA polymerase large  
386 subunit (NCVOG0271), RNA polymerase small subunit (NCVOG0274), B-family DNA  
387 polymerase (NCVOG0038), and major capsid protein (NCVOG0022). Resulting hits were then  
388 queried against the NCBI refseq protein database (56) and only contigs with top hits to virus  
389 genes were maintained for subsequent analyses. A similar method was used to identify viroplasm  
390 transcripts, where the viroplasm major capsid protein and packaging ATPase genes were used as  
391 markers.

392 Contigs derived from ssRNA viruses were identified by screening the contig library for  
393 RNA-dependent RNA Polymerase (RDRP), a distinctive and wholly conserved RNA virus gene  
394 and a strong phylogenetic marker (57). A BLAST database of RDRP sequences was downloaded  
395 from the pfam database (58) under code pf00680. Contigs were aligned using Blastx with a  
396 minimum evalue of  $10^{-4}$ . Hits were queried against the NCBI refseq protein database and only  
397 hits to viral RDRP genes were retained for downstream analyses.

398 To identify RNA virus genome fragments, contig libraries were screened as described  
399 above using the following core set of genes observed in RNA viruses: CRPV capsid (Pfam  
400 08762), VP4 (Pfam 11492), RdRP (Pfam 00680), Peptidase C3 (Pfam 00548), Peptidase C3G  
401 (Pfam 12381), Rhv (Pfam 00073), and RNA Helicase (Pfam 00910). BLAST databases for core  
402 RNA virus genes were constructed from reference sequences downloaded from pfam. Query  
403 sequences were then cross-referenced to identify contigs with hits to multiple RNA virus core  
404 genes. Only contigs > 1000 bases with at least one viral RDRP region were retained for further  
405 analysis. ORFs were predicted on these putative partial genomes using the CLC Genomics  
406 Workbench. Features on the partial genomes were predicted using the Pfam HMM domain and  
407 the NCBI Conserved Domain Database searches (59, 60). Genome architecture was visualized  
408 using the Illustrator for Biological Sequences (IBS) software package (61).

#### 409 *Phylogenetic Analysis*

410 Reference sequences for viral marker genes and Rpb1 were downloaded from the  
411 InterPro and RefSeq databases (STable 1) (62). Reference sequences were aligned using the  
412 MUSCLE alignment algorithm (63) in the MEGA v7.0.26 software package (64). Maximum  
413 likelihood phylogenetic trees were constructed in PhyML (65) with the LG substitution model  
414 and the aLRT SH-like likelihood method. Putative viral and Rpb1 contigs assembled from the  
415 metatranscriptomes were translated into proteins according to the reading frame of the top  
416 BLAST hit. Translated proteins were placed on the reference trees in a maximum likelihood  
417 framework in pplacer (66). Trees with abundance data were visualized using the iTOL web  
418 interface (67).

#### 419 *Statistical Analysis*

420           Quality filtered and trimmed reads were stringently mapped to the selected contigs (0.97  
421 identity fraction, 0.7 length fraction) in CLC Genomics Workbench 10.0.1. Expression values  
422 were calculated as a modification of the transcript per million (TPM) metric. Read counts were  
423 normalized by contig length in kb to determine the reads per kilobase (RPK) values for every  
424 contig within each library. These RPK values were then summed and divided by 1 million, to  
425 determine the sequencing depth scaling factor for each library. TPM for a contig was calculated  
426 by dividing its RPK value by the scaling factor for the library.

427           Expression values for contigs were imported into the PRIMER7 (68) statistical software  
428 package and  $\log_2$  transformed. Expression values from each contig were correlated (Pearson's  
429 rho) to one another and statistically grouped by co-occurrence using group average hierarchical  
430 clustering. The SIMPROF test (69) was used to determine the statistical significance level of  
431 resulting clusters ( $\alpha = 0.05$ , 1000 permutations). Statistically significant clusters with at least  
432 one viral contig, one *rpb1* contig and less than 10 total members were visualized and annotated  
433 in Cytoscape 3.5.1 (70).

#### 434 *Accession Numbers*

435           Full RNA-seq libraries have been made publicly available on the JGI website under  
436 accession number Gp0146911.

437

438 *Acknowledgements*

439 Research sponsored by the *Laboratory Directed Research and Development* Program of Oak

440 Ridge National Laboratory and the *Joint Directed Research and Development Program* of the

441 University of Tennessee. Support for the SPRUCE experimental site is from the U.S. Department

442 of Energy, Office of Science, Office of Biological and Environmental Research. Oak Ridge

443 National Laboratory is managed by UT- Battelle, LLC, for the U.S. Department of Energy under

444 contract DE-AC05-00OR22725. Support at UT was received from the *Kenneth & Blaire*

445 *Mossman Endowment* to the University of Tennessee (SWW).

446 **References**

447

- 448 1. **Post WM, Emanuel WR, Zinke PJ, Stangenberger AG.** 1982. Soil carbon pools and  
449 world life zones. *Nature* **298**:156-159.
- 450 2. **Gorham E.** 1991. Northern peatlands: role in the carbon cycle and probable responses to  
451 climatic warming. *Ecological applications* **1**:182-195.
- 452 3. **Bridgman SD, Patrick Megonigal J, Keller JK, Bliss NB, Trettin C.** 2006. The carbon  
453 balance of North American wetlands. *Wetlands* **26**:889-916.
- 454 4. **van Breemen N.** 1995. How Sphagnum bogs down other plants. *Trends in Ecology &*  
455 *Evolution* **10**:270-275.
- 456 5. **Lamers LPM, Bobbink R, Roelofs JGM.** 2000. Natural nitrogen filter fails in polluted  
457 raised bogs. *Global Change Biology* **6**:583-586.
- 458 6. **Turetsky MR.** 2003. The role of bryophytes in carbon and nitrogen cycling. *Bryologist*  
459 **106**:395-409.
- 460 7. **Turetsky MR, Bond-Lamberty B, Euskirchen E, Talbot J, Frolking S, McGuire AD,**  
461 **Tuittila ES.** 2012. The resilience and functional role of moss in boreal and arctic  
462 ecosystems. *New Phytologist* **196**:49-67.
- 463 8. **Verhoeven JTA, Liefveld WM.** 1997. The ecological significance of organochemical  
464 compounds in Sphagnum. *Acta Botanica Neerlandica* **46**:117-130.
- 465 9. **Mellegard H, Stalheim T, Hormazabal V, Granum PE, Hardy SP.** 2009.  
466 Antibacterial activity of sphagnum acid and other phenolic compounds found in  
467 Sphagnum papillosum against food-borne bacteria. *Letters in Applied Microbiology*  
468 **49**:85-90.
- 469 10. **Freeman C, Ostle N, Kang H.** 2001. An enzymic 'latch' on a global carbon store - A  
470 shortage of oxygen locks up carbon in peatlands by restraining a single enzyme. *Nature*  
471 **409**:149-149.
- 472 11. **Stalheim T, Ballance S, Christensen BE, Granum PE.** 2009. Sphagnum - a pectin-like  
473 polymer isolated from Sphagnum moss can inhibit the growth of some typical food  
474 spoilage and food poisoning bacteria by lowering the pH. *Journal of Applied*  
475 *Microbiology* **106**:967-976.
- 476 12. **Hajek T, Ballance S, Limpens J, Zijlstra M, Verhoeven JTA.** 2011. Cell-wall  
477 polysaccharides play an important role in decay resistance of Sphagnum and actively  
478 depressed decomposition in vitro. *Biogeochemistry* **103**:45-57.
- 479 13. **Lin X, Tfaily MM, Green SJ, Steinweg JM, Chanton P, Invittaya A, Chanton JP,**  
480 **Cooper W, Schadt C, Kostka JE.** 2014. Microbial Metabolic Potential for Carbon  
481 Degradation and Nutrient (Nitrogen and Phosphorus) Acquisition in an Ombrotrophic  
482 Peatland. *Applied and Environmental Microbiology* **80**:3531-3540.
- 483 14. **Leppanen S, Rissanen A, Tirola M.** 2015. Nitrogen fixation in Sphagnum mosses is  
484 affected by moss species and water table level. *Plant and Soil* **389**:185-196.
- 485 15. **Kostka JE, Weston DJ, Glass JB, Lilleskov EA, Shaw AJ, Turetsky MR.** 2016. The  
486 Sphagnum microbiome: new insights from an ancient plant lineage. *New Phytologist*  
487 **211**:57-64.

- 488 16. **Dudova L, Hajkova P, Buchtova H, Opravilova V.** 2013. Formation, succession and  
489 landscape history of Central-European summit raised bogs: A multiproxy study from the  
490 Hruby Jeseník Mountains. *Holocene* **23**:230-242.
- 491 17. **Ireland AW, Clifford MJ, Booth RK.** 2014. Widespread dust deposition on North  
492 American peatlands coincident with European land-clearance. *Vegetation History and*  
493 *Archaeobotany* **23**:693-700.
- 494 18. **Swindles GT, Turner TE, Roe HM, Hall VA, Rea HA.** 2015. Testing the cause of the  
495 *Sphagnum austinii* (Sull. ex Aust.) decline: Multiproxy evidence from a raised bog in  
496 Northern Ireland. *Review of Palaeobotany and Palynology* **213**:17-26.
- 497 19. **Galka M, Tobolski K, Gorska A, Lamentowicz M.** 2017. Resilience of plant and  
498 testate amoeba communities after climatic and anthropogenic disturbances in a Baltic bog  
499 in Northern Poland: Implications for ecological restoration. *Holocene* **27**:130-141.
- 500 20. **Opelt K, Chobot V, Hadacek F, Schonmann S, Eberl L, Berg G.** 2007. Investigations  
501 of the structure and function of bacterial communities associated with *Sphagnum* mosses.  
502 *Environmental Microbiology* **9**:2795-2809.
- 503 21. **Bragina A, Cardinale M, Berg C, Berg G.** 2013. Vertical transmission explains the  
504 specific Burkholderia pattern in *Sphagnum* mosses at multi-geographic scale. *Frontiers in*  
505 *Microbiology* **4**:10.
- 506 22. **Bragina A, Maier S, Berg C, Muller H, Chobot V, Hadacek F, Berg G.** 2012. Similar  
507 diversity of Alphaproteobacteria and nitrogenase gene amplicons on two related  
508 *Sphagnum* mosses. *Frontiers in Microbiology* **3**:10.
- 509 23. **Opelt K, Berg G.** 2004. Diversity and antagonistic potential of bacteria associated with  
510 bryophytes from nutrient-poor habitats of the Baltic Sea coast. *Applied and*  
511 *Environmental Microbiology* **70**:6569-6579.
- 512 24. **Brussaard CPD, Wilhelm SW, Thingstad F, Weinbauer MG, Bratbak G, Heldal M,**  
513 **Kimmance SA, Middelboe M, Nagasaki K, Paul JH, Schroeder DC, Suttle CA,**  
514 **Vaque D, Wommack KE.** 2008. Global-scale processes with a nanoscale drive: the role  
515 of marine viruses. *ISME J* **2**:575-578.
- 516 25. **Jover LF, Effler TC, Buchan A, Wilhelm SW, Weitz JS.** 2014. The elemental  
517 composition of virus particles: implications for marine biogeochemical cycles. *Nat Rev*  
518 *Micro* **12**:519-528.
- 519 26. **Wilhelm SW, Suttle CA.** 1999. Viruses and Nutrient Cycles in the SeaViruses play  
520 critical roles in the structure and function of aquatic food webs. *BioScience* **49**:781-788.
- 521 27. **Thingstad TF, Lignell R.** 1997. Theoretical models for the control of bacterial growth  
522 rate, abundance, diversity and carbon demand. *Aquatic Microbial Ecology* **13**:19-27.
- 523 28. **Roux S, Brum JR, Dutilh BE, Sunagawa S, Duhaime MB, Loy A, Poulos BT,**  
524 **Solonenko N, Lara E, Poulain J, Pesant S, Kandels-Lewis S, Dimier C, Picheral M,**  
525 **Searson S, Cruaud C, Alberti A, Duarte CM, Gasol JM, Vaque D, Bork P, Acinas**  
526 **SG, Wincker P, Sullivan MB, Tara Oceans C.** 2016. Ecogenomics and potential  
527 biogeochemical impacts of globally abundant ocean viruses. *Nature* **537**:689-+.
- 528 29. **Simmonds P, Adams MJ, Benko M, Breitbart M, Brister JR, Carstens EB, Davison**  
529 **AJ, Delwart E, Gorbalenya AE, Harrach B, Hull R, King AMQ, Koonin EV,**  
530 **Krupovic M, Kuhn JH, Lefkowitz EJ, Nibert ML, Orton R, Roossinck MJ,**  
531 **Sabanadzovic S, Sullivan MB, Suttle CA, Tesh RB, van der Vlugt RA, Varsani A,**  
532 **Zerbini M.** 2017. Virus taxonomy in the age of metagenomics. *Nature Reviews*  
533 *Microbiology* **15**:161-168.



- 534 30. **Steward GF, Culley AI, Mueller JA, Wood-Charlson EM, Belcaid M, Poisson G.**  
535 2013. Are we missing half of the viruses in the ocean? *The ISME Journal* **7**:672-679.
- 536 31. **Wilhelm SW, Bird JT, Bonifer KS, Calfee BC, Chen T, Coy SR, Gainer PJ, Gann**  
537 **ER, Heatherly HT, Lee J, Liang XL, Liu J, Armes AC, Moniruzzaman M, Rice JH,**  
538 **Stough JMA, Tams RN, Williams EP, LeClerc GR.** 2017. A Student's Guide to Giant  
539 Viruses Infecting Small Eukaryotes: From Acanthamoeba to Zooxanthellae. *Viruses-*  
540 *Basel* **9**:18.
- 541 32. **Yutin N, Wolf YI, Raoult D, Koonin EV.** 2009. Eukaryotic large nucleo-cytoplasmic  
542 DNA viruses: Clusters of orthologous genes and reconstruction of viral genome  
543 evolution. *Virology Journal* **6**:13.
- 544 33. **Moniruzzaman M, Wurch LL, Alexander H, Dyhrman ST, Gobler CJ, Wilhelm**  
545 **SW.** 2017. Virus-host relationships of marine single-celled eukaryotes resolved from  
546 metatranscriptomics. *Nature Communications* **8**:10.
- 547 34. **Schulz F, Yutin N, Ivanova NN, Ortega DR, Lee TK, Vierheilig J, Daims H, Horn**  
548 **M, Wagner M, Jensen GJ, Kyrpides NC, Koonin EV, Woyke T.** 2017. Giant viruses  
549 with an expanded complement of translation system components. *Science* **356**:82-+.
- 550 35. **Moniruzzaman M, LeClerc GR, Brown CM, Gobler CJ, Bidle KD, Wilson WH,**  
551 **Wilhelm SW.** 2014. Genome of brown tide virus (AaV), the little giant of the  
552 Megaviridae, elucidates NCLDV genome expansion and host-virus coevolution.  
553 *Virology* **466-467**:60-70.
- 554 36. **Moniruzzaman M, Gann ER, Wilhelm SW.** 2018. Infection by a Giant Virus (AaV)  
555 Induces Widespread Physiological Reprogramming in *Aureococcus anophagefferens*  
556 CCMP1984 – A Harmful Bloom Algae. *Frontiers in Microbiology* **9**.
- 557 37. **Wilhelm SW, Coy SR, Gann ER, Moniruzzaman M, Stough JMA.** 2016. Standing on  
558 the shoulders of giant viruses: five lessons learned about large viruses infecting small  
559 eukaryotes and the opportunities they create. *Plos Pathogens* **12**:5.
- 560 38. **Kerepesi C, Grolmusz V.** 2017. The "Giant Virus Finder" discovers an abundance of  
561 giant viruses in the Antarctic dry valleys. *Archives of Virology* **162**:1671-1676.
- 562 39. **Rusin LY.** 2016. Metagenomics and biodiversity of sphagnum bogs. *Molecular Biology*  
563 **50**:645-648.
- 564 40. **Krupovic M, Koonin EV.** 2014. Evolution of eukaryotic single-stranded DNA viruses of  
565 the Bidnaviridae family from genes of four other groups of widely different viruses.  
566 *Scientific Reports* **4**:5347.
- 567 41. **Krupovic M, Koonin EV.** 2015. Polintons: a hotbed of eukaryotic virus, transposon and  
568 plasmid evolution. *Nature Reviews Microbiology* **13**:105.
- 569 42. **Tomaru Y, Nagasaki K.** 2007. Flow cytometric detection and enumeration of DNA and  
570 RNA viruses infecting marine eukaryotic microalgae. *Journal of Oceanography* **63**:215-  
571 221.
- 572 43. **Miranda JA, Culley AI, Schvarcz CR, Steward GF.** 2016. RNA viruses as major  
573 contributors to Antarctic viroplankton. *Environmental Microbiology* **18**:3714-3727.
- 574 44. **Quaiser A, Krupovic M, Dufresne A, Francez A-J, Roux S.** 2016. Diversity and  
575 comparative genomics of chimeric viruses in Sphagnum-dominated peatlands. *Virus*  
576 *Evolution* **2**:vew025-vew025.
- 577 45. **Quaiser A, Dufresne A, Ballaud F, Roux S, Zivanovic Y, Colombet J, Sime-Ngando**  
578 **T, Francez A-J.** 2015. Diversity and comparative genomics of Microviridae in  
579 Sphagnum- dominated peatlands. *Frontiers in Microbiology* **6**.

- 580 46. **Ballaud F, Dufresne A, Francez A-J, Colombet J, Sime-Ngando T, Quaiser A.** 2015.  
581 Dynamics of Viral Abundance and Diversity in a Sphagnum-Dominated Peatland:  
582 Temporal Fluctuations Prevail Over Habitat. *Frontiers in Microbiology* **6**:1494.
- 583 47. **Dorigo U, Jacquet S, Humbert JF.** 2004. Cyanophage diversity, inferred from g20 gene  
584 analyses, in the largest natural lake in France, Lake Bourget. *Applied and Environmental*  
585 *Microbiology* **70**:1017-1022.
- 586 48. **Roux S, Enault F, Robin A, Ravet V, Personnic S, Theil S, Colombet J, Sime-**  
587 **Ngando T, Debros D.** 2012. Assessing the Diversity and Specificity of Two Freshwater  
588 Viral Communities through Metagenomics. *Plos One* **7**:12.
- 589 49. **Comeau AM, Krisch HM.** 2008. The capsid of the T4 phage superfamily: The  
590 evolution, diversity, and structure of some of the most prevalent proteins in the biosphere.  
591 *Molecular Biology and Evolution* **25**:1321-1332.
- 592 50. **Sakowski EG, Munsell EV, Hyatt M, Kress W, Williamson SJ, Nasko DJ, Polson**  
593 **SW, Wommack KE.** 2014. Ribonucleotide reductases reveal novel viral diversity and  
594 predict biological and ecological features of unknown marine viruses. *Proceedings of the*  
595 *National Academy of Sciences of the United States of America* **111**:15786-15791.
- 596 51. **Alexander H, Jenkins BD, Rynearson TA, Dyhrman ST.** 2015. Metatranscriptome  
597 analyses indicate resource partitioning between diatoms in the field. *Proceedings of the*  
598 *National Academy of Sciences* **112**:E2182-E2190.
- 599 52. **Wilson RM, Hopple AM, Tfaily MM, Sebestyen SD, Schadt CW, Pfeifer-Meister L,**  
600 **Medvedeff C, McFarlane KJ, Kostka JE, Kolton M, Kolka RK, Kluber LA, Keller**  
601 **JK, Guilderson TP, Griffiths NA, Chanton JP, Bridgham SD, Hanson PJ.** 2016.  
602 Stability of peatland carbon to rising temperatures. *Nature Communications* **7**:10.
- 603 53. **Hanson PJ, Riggs JS, Nettles WR, Phillips JR, Krassovski MB, Hook LA, Gu L,**  
604 **Richardson AD, Aubrecht DM, Ricciuto DM.** 2017. Attaining whole-ecosystem  
605 warming using air and deep-soil heating methods with an elevated CO<sub>2</sub> atmosphere.  
606 *Biogeosciences* **14**:861.
- 607 54. **Warren MJ, Lin XJ, Gaby JC, Kretz CB, Kolton M, Morton PL, Pett-Ridge J,**  
608 **Weston DJ, Schadt CW, Kostka JE, Glass JB.** 2017. Molybdenum-Based Diazotrophy  
609 in a Sphagnum Peatland in Northern Minnesota. *Applied and Environmental*  
610 *Microbiology* **83**:14.
- 611 55. **Kopylova E, Noe L, Touzet H.** 2012. SortMeRNA: fast and accurate filtering of  
612 ribosomal RNAs in metatranscriptomic data. *Bioinformatics* **28**:3211-3217.
- 613 56. **O'Leary NA, Wright MW, Brister JR, Ciufu S, Haddad D, McVeigh R, Rajput B,**  
614 **Robbertse B, Smith-White B, Ako-Adjei D, Astashyn A, Badretdin A, Bao Y,**  
615 **Blinkova O, Brover V, Chetvernin V, Choi J, Cox E, Ermolaeva O, Farrell CM,**  
616 **Goldfarb T, Gupta T, Haft D, Hatcher E, Hlavina W, Joardar VS, Kodali VK, Li**  
617 **W, Maglott D, Masterson P, McGarvey KM, Murphy MR, O'Neill K, Pujar S,**  
618 **Rangwala SH, Rausch D, Riddick LD, Schoch C, Shkeda A, Storz SS, Sun H,**  
619 **Thibaud-Nissen F, Tolstoy I, Tully RE, Vatsan AR, Wallin C, Webb D, Wu W,**  
620 **Landrum MJ, Kimchi A, et al.** 2016. Reference sequence (RefSeq) database at NCBI:  
621 current status, taxonomic expansion, and functional annotation. *Nucleic Acids Res*  
622 **44**:D733-745.
- 623 57. **Koonin EV.** 1991. The phylogeny of RNA-dependent RNA polymerases of positive-  
624 strand RNA viruses. *Journal of General Virology* **72**:2197-2206.

- 625 58. **Finn RD, Coggill P, Eberhardt RY, Eddy SR, Mistry J, Mitchell AL, Potter SC,**  
626 **Punta M, Qureshi M, Sangrador-Vegas A, Salazar GA, Tate J, Bateman A.** 2016.  
627 The Pfam protein families database: towards a more sustainable future. *Nucleic Acids*  
628 *Research* **44**:D279-D285.
- 629 59. **Finn RD, Clements J, Arndt W, Miller BL, Wheeler TJ, Schreiber F, Bateman A,**  
630 **Eddy SR.** 2015. HMMER web server: 2015 update. *Nucleic Acids Research* **43**:W30-  
631 W38.
- 632 60. **Marchler-Bauer A, Derbyshire MK, Gonzales NR, Lu SN, Chitsaz F, Geer LY, Geer**  
633 **RC, He J, Gwadz M, Hurwitz DI, Lanczycki CJ, Lu F, Marchler GH, Song JS,**  
634 **Thanki N, Wang ZX, Yamashita RA, Zhang DC, Zheng CJ, Bryant SH.** 2015. CDD:  
635 NCBI's conserved domain database. *Nucleic Acids Research* **43**:D222-D226.
- 636 61. **Liu WZ, Xie YB, Ma JY, Luo XT, Nie P, Zuo ZX, Lahrmann U, Zhao Q, Zheng YY,**  
637 **Zhao Y, Xue Y, Ren J.** 2015. IBS: an illustrator for the presentation and visualization of  
638 biological sequences. *Bioinformatics* **31**:3359-3361.
- 639 62. **Finn RD, Attwood TK, Babbitt PC, Bateman A, Bork P, Bridge AJ, Chang HY,**  
640 **Dosztanyi Z, El-Gebali S, Fraser M, Gough J, Haft D, Holliday GL, Huang HZ,**  
641 **Huang XS, Letunic I, Lopez R, Lu SN, Marchler-Bauer A, Mi HY, Mistry J, Natale**  
642 **DA, Necci M, Nuka G, Orengo CA, Park Y, Pesseat S, Piovesan D, Potter SC,**  
643 **Rawlings ND, Redaschi N, Richardson L, Rivoire C, Sangrador-Vegas A, Sigrist C,**  
644 **Sillitoe I, Smithers B, Squizzato S, Sutton G, Thanki N, Thomas PD, Tosatto SCE,**  
645 **Wu CH, Xenarios I, Yeh LS, Young SY, Mitchell AL.** 2017. InterPro in 2017-beyond  
646 protein family and domain annotations. *Nucleic Acids Research* **45**:D190-D199.
- 647 63. **Edgar RC.** 2004. MUSCLE: a multiple sequence alignment method with reduced time  
648 and space complexity. *Bmc Bioinformatics* **5**:1-19.
- 649 64. **Kumar S, Stecher G, Tamura K.** 2016. MEGA7: Molecular evolutionary genetics  
650 analysis version 7.0 for bigger datasets. *Molecular Biology and Evolution* **33**:1870-1874.
- 651 65. **Guindon S, Dufayard JF, Lefort V, Anisimova M, Hordijk W, Gascuel O.** 2010.  
652 New algorithms and methods to estimate maximum-likelihood phylogenies: assessing the  
653 performance of PhyML 3.0. *Systematic Biology* **59**:307-321.
- 654 66. **Matsen FA, Kodner RB, Armbrust EV.** 2010. pplacer: linear time maximum-  
655 likelihood and Bayesian phylogenetic placement of sequences onto a fixed reference tree.  
656 *Bmc Bioinformatics* **11**:16.
- 657 67. **Letunic I, Bork P.** 2016. Interactive tree of life (iTOL) v3: an online tool for the display  
658 and annotation of phylogenetic and other trees. *Nucleic Acids Research* **44**:W242-W245.
- 659 68. **Clark KR, Gorley RN.** 2015. PRIMER v7: User manual/tutorial. PRIMER-E, Plymouth.
- 660 69. **Clarke KR, Somerfield PJ, Gorley RN.** 2008. Testing of null hypotheses in exploratory  
661 community analyses: similarity profiles and biota-environment linkage. *Journal of*  
662 *Experimental Marine Biology and Ecology* **366**:56-69.
- 663 70. **Shannon P, Markiel A, Ozier O, Baliga NS, Wang JT, Ramage D, Amin N,**  
664 **Schwikowski B, Ideker T.** 2003. Cytoscape: A software environment for integrated  
665 models of biomolecular interaction networks. *Genome Research* **13**:2498-2504.

666

667

## 668 **Figure Legends**

669 Figure 1: Phylogenetic placement of identified phage major capsid protein contigs (red) on a  
670 Myovirus *gp23* maximum likelihood reference tree (references in black). Node support (aLRT-  
671 SH statistic) > 50% are shown. Contigs are shown with their abundance ( $\log_2$  transformed TPM)  
672 in a heatmap surrounding the tree. Sample order on the heatmap is provided in the inset.

673 Figure 2: Phylogenetic placement of identified ssRNA virus RNA-dependent RNA polymerase  
674 contigs on maximum likelihood reference tree. Branch width represents the number of contigs  
675 placed on the reference branch. Node support (aLRT-SH statistic) >50% are shown.

676 Figure 3: Phylogeny, genome architecture, and abundance of partial ssRNA virus genomes. Tree  
677 represents phylogenetic placement of RDRP gene regions from partial ssRNA virus genome  
678 contigs (red) on a maximum likelihood reference tree (references in black). Node support (aLRT-  
679 SH statistic) >50% are shown. Center panel represents genome architecture determined by  
680 conserved domain search and ORF prediction. Length of contigs and gene regions is measured in  
681 kb. Heat map in right panel shows abundance of reads mapped to partial genome contigs in  $\log_2$   
682 TPM from each of the 6 metatranscriptome libraries.

683 Figure 4. Phylogenetic placement of identified NCLDV major capsid protein contigs (red) on a  
684 maximum likelihood reference tree (references in black). Node support (aLRT-SH statistic)  
685 >50% are shown. Contigs are shown with their abundance ( $\log_2$  transformed TPM) in a heatmap  
686 surrounding the tree.

687 Figure 5: Phylogenetic placement of identified virophage A.) major capsid protein and B.)  
688 ATPase contigs (red) on a maximum likelihood reference tree (references in black). Node  
689 support (aLRT-SH statistic) >50% are shown.

690 Figure 6: Correlation co-occurrence network analysis of conserved viral gene and host RNA  
691 polymerase expression for A.) bacteriophage (Gp23), B.) ssRNA viruses (RDRP), and C.)  
692 NCLDVs (NCLDV MCP). Nodes in red represent virus contigs and blue nodes represent  
693 potential hosts. Nodes are connected by edges colored according to the Pearson correlation  
694 coefficient values between to contigs. Only relationships with contigs expressed in more than  
695 one sample are shown.

696

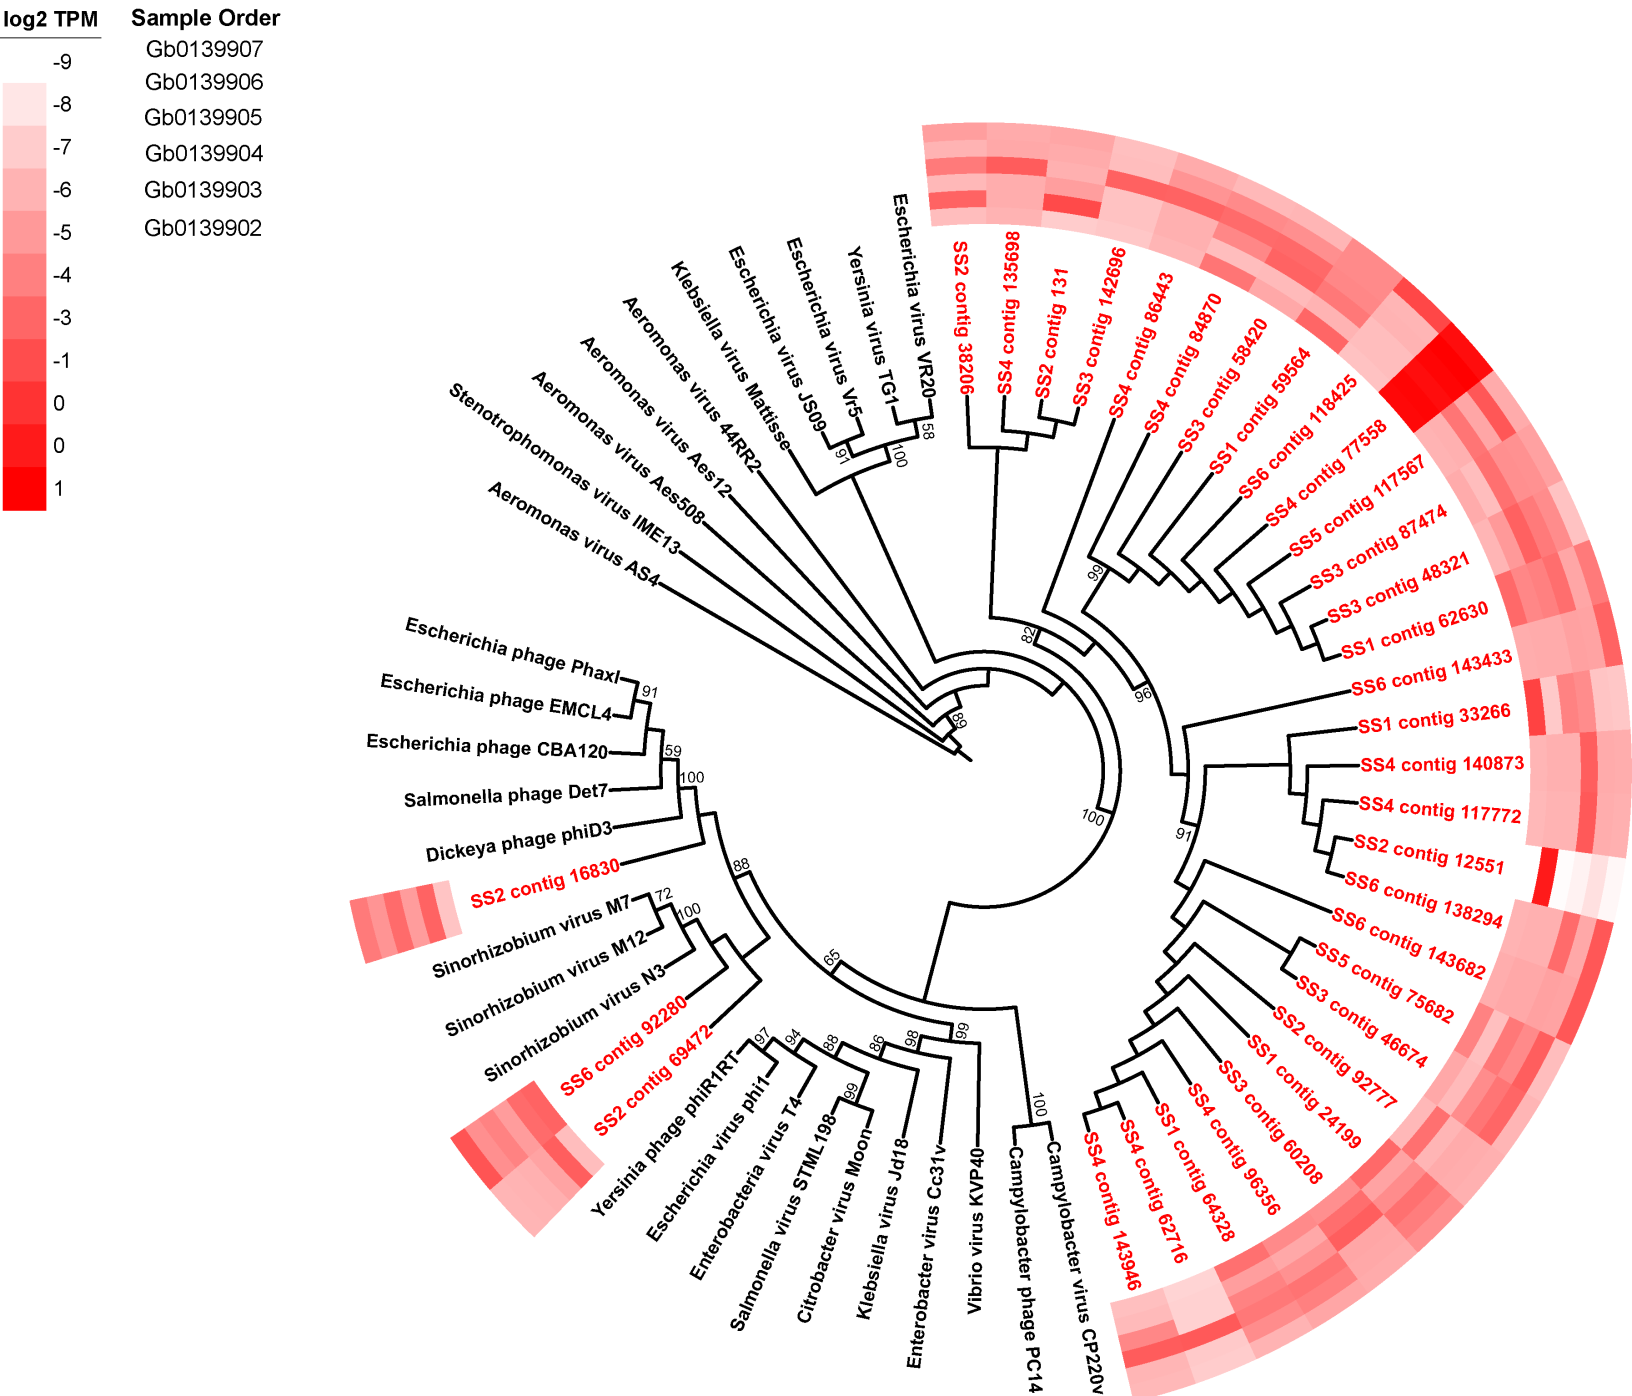

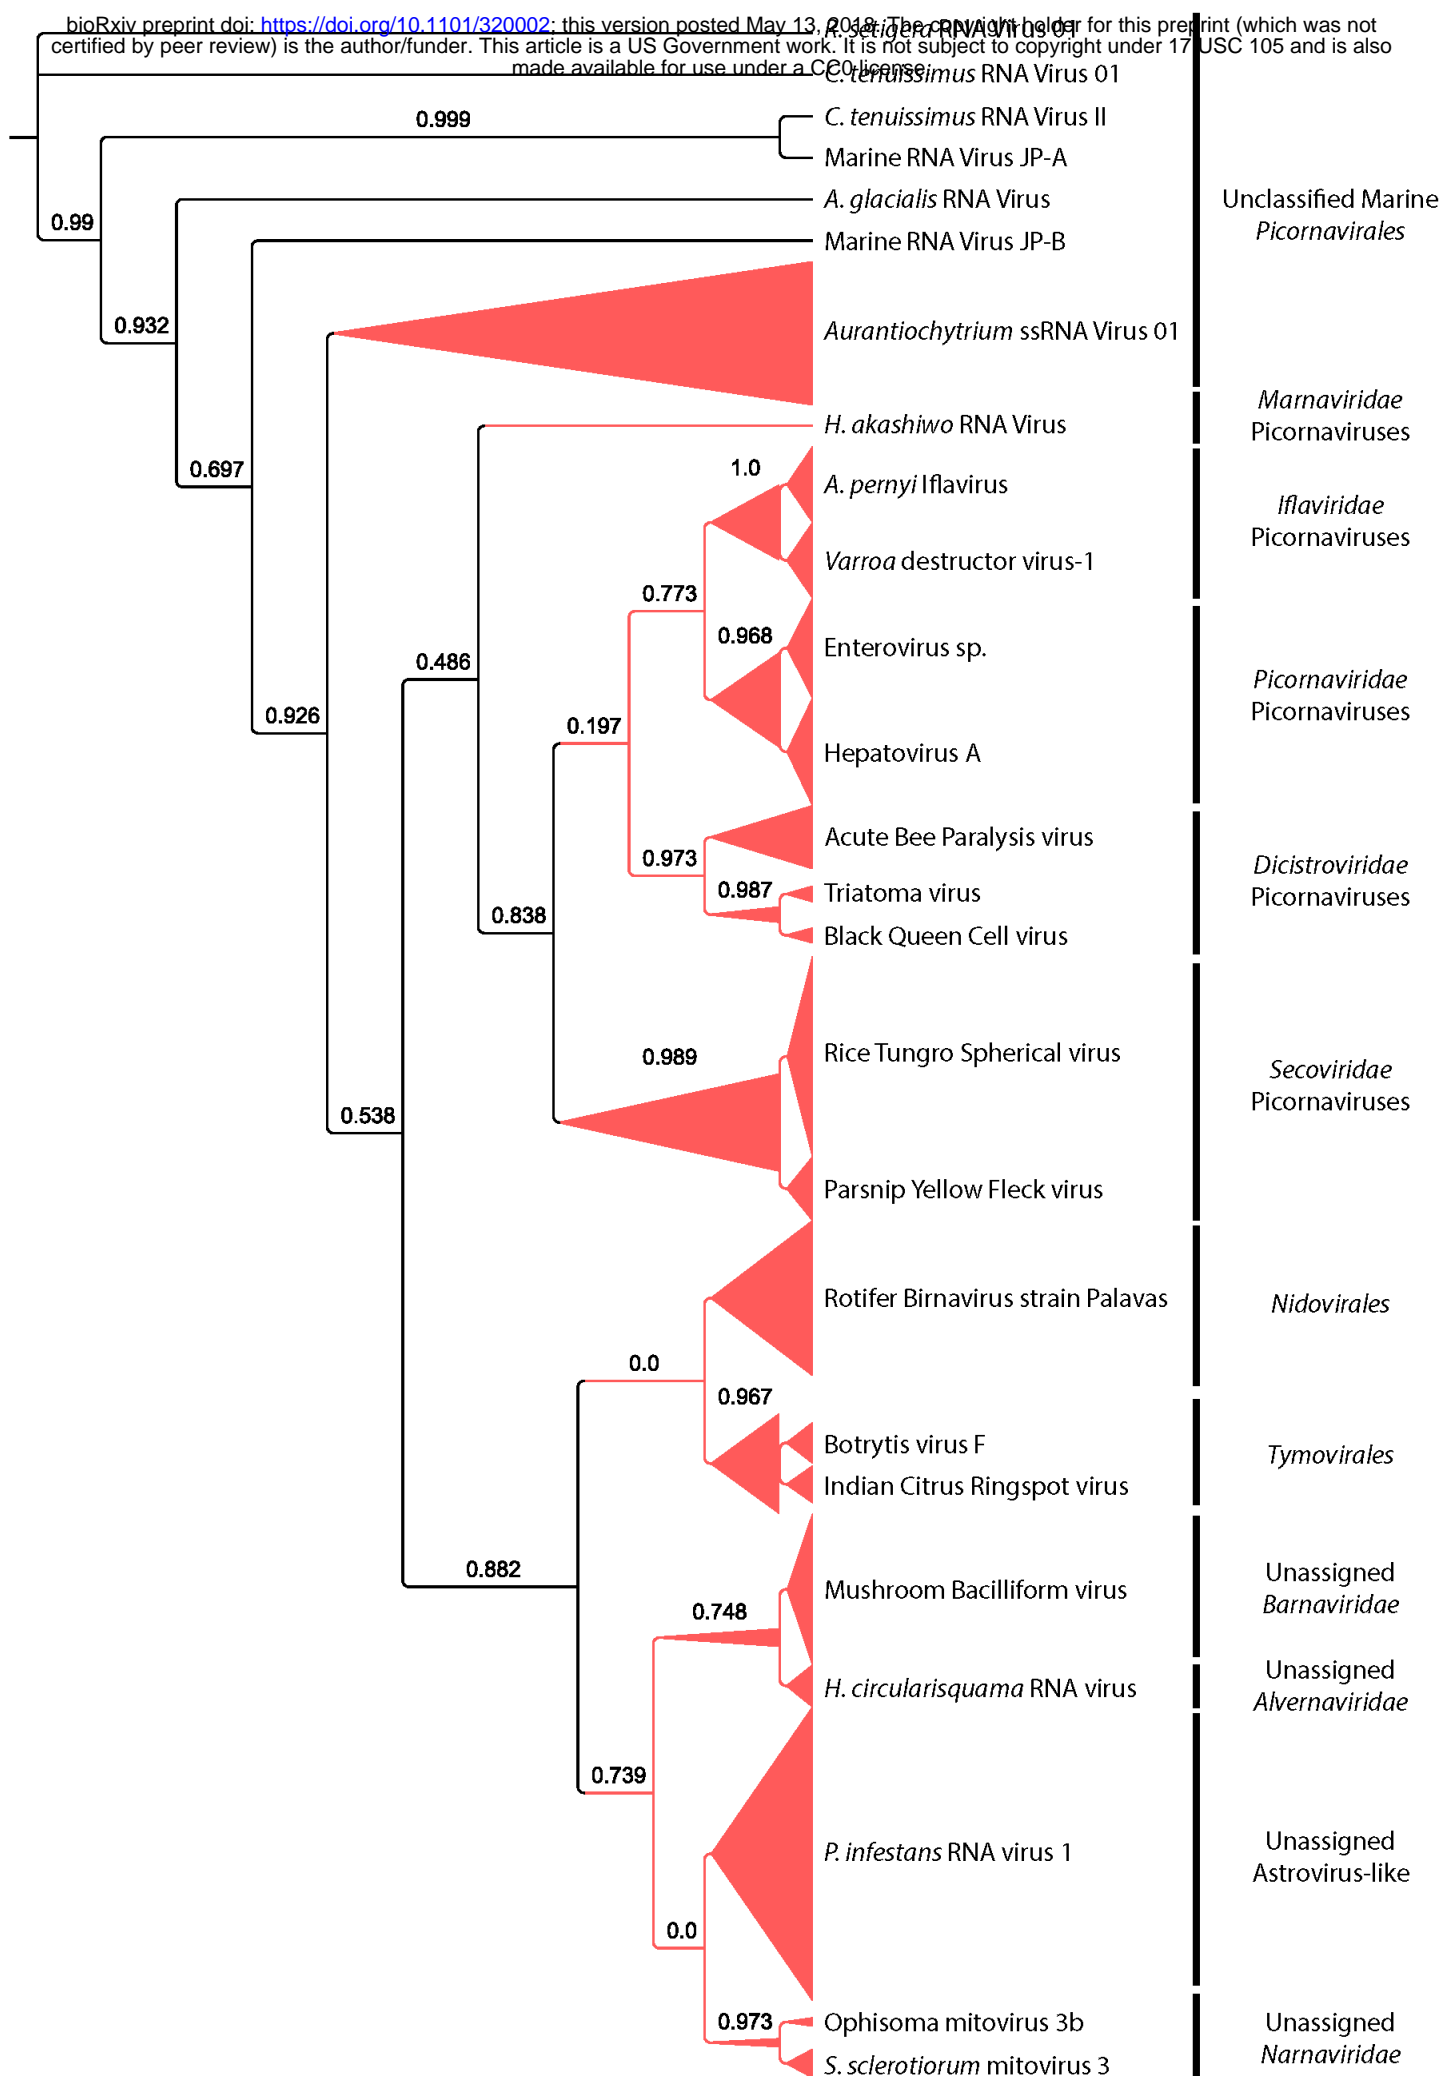

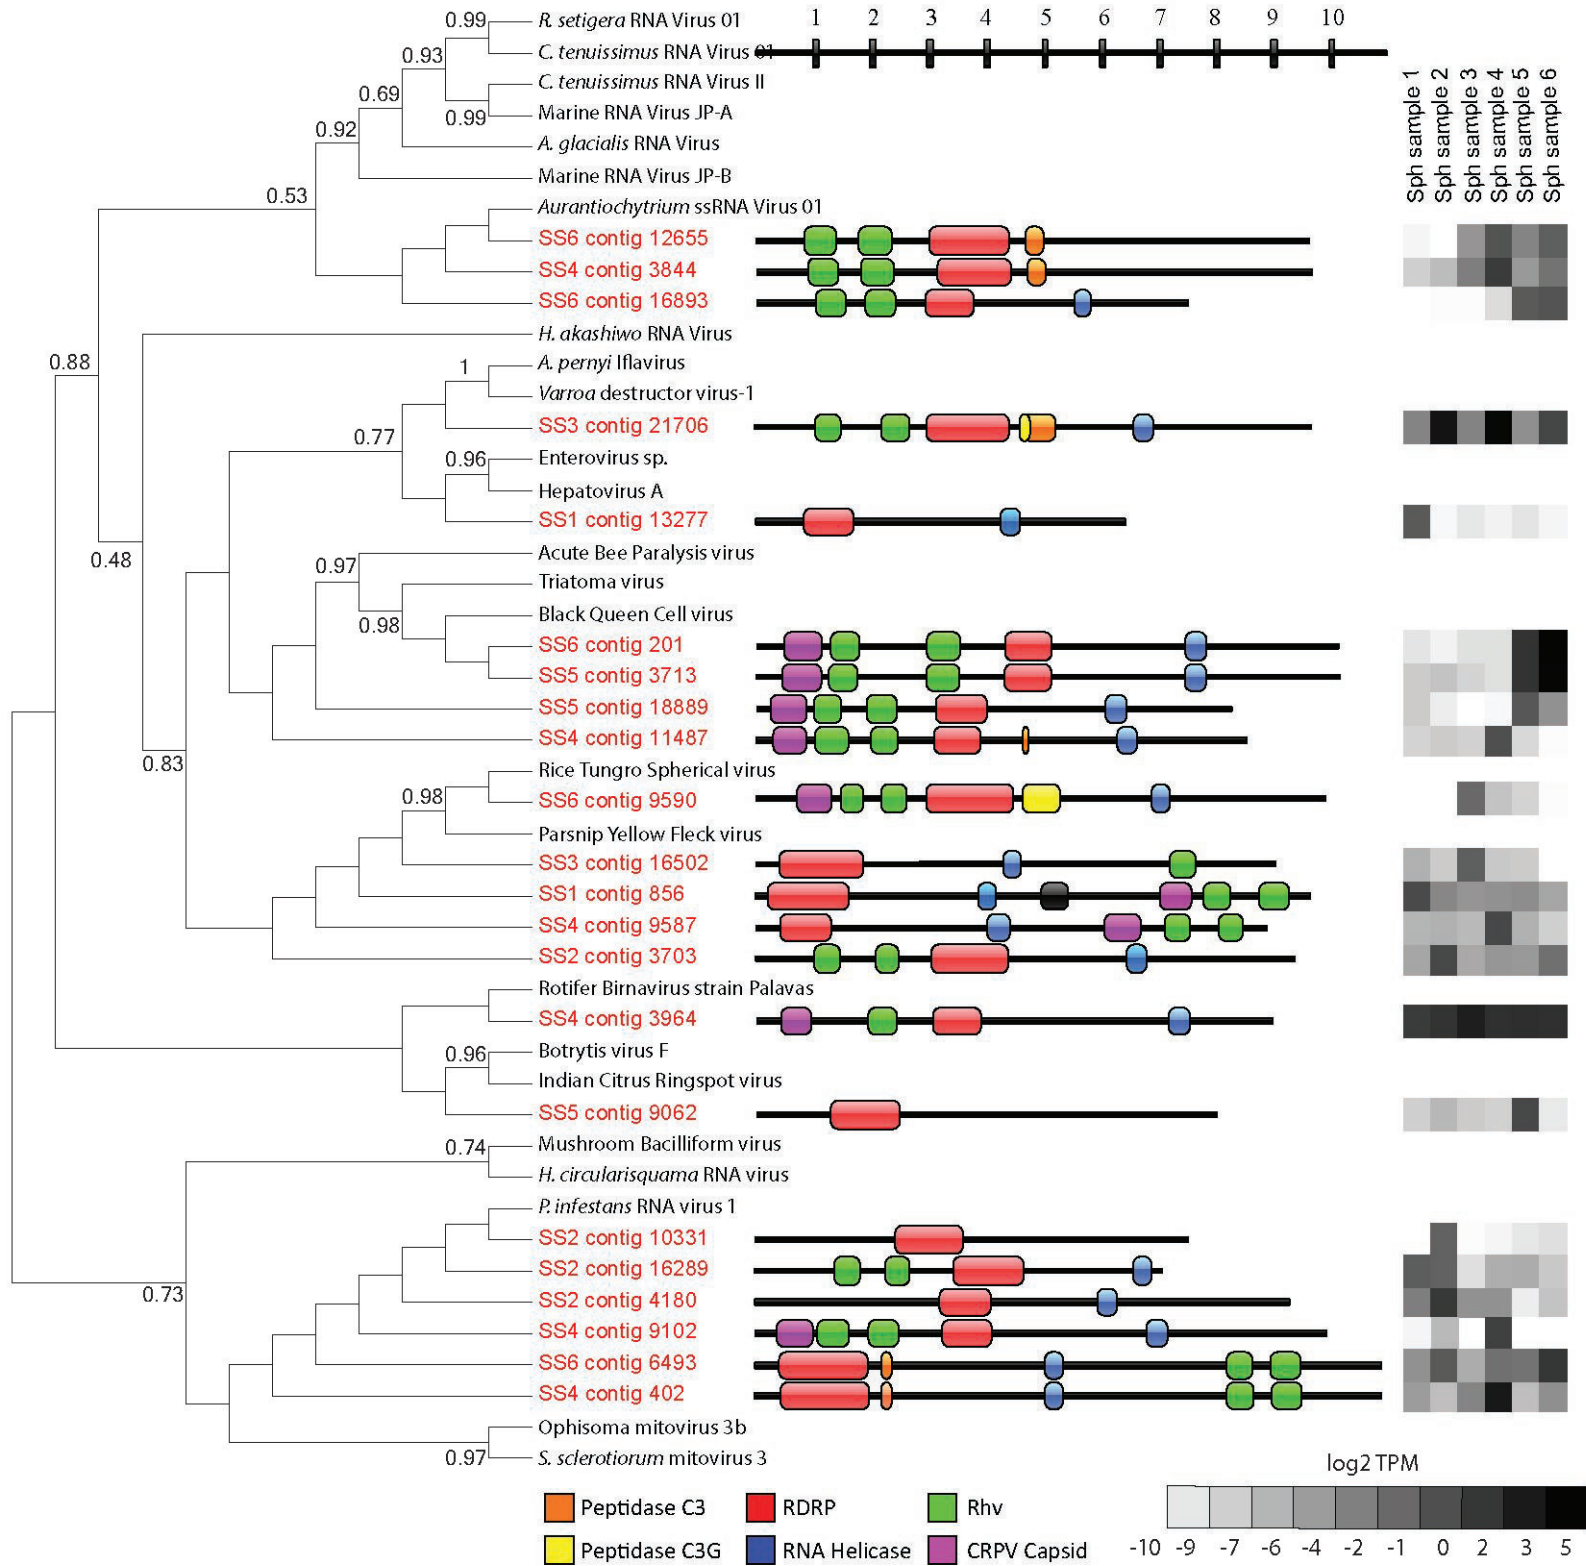

Figure 3: Phylogeny, genome architecture, and abundance of partial ssRNA virus genomes. Tree represents phylogenetic placement of RDRP gene regions from partial ssRNA virus genome contigs on a maximum likelihood reference tree. Node support (aLRT-SH statistic) >50% are shown. Center panel represents genome architecture determined by conserved domain search and ORF prediction. Length of contigs and gene regions is measured in kb. Heat map in right panel shows abundance of reads mapped to partial genome contigs in log<sub>2</sub> TPM from each of the 6 metatranscriptome libraries.





**A**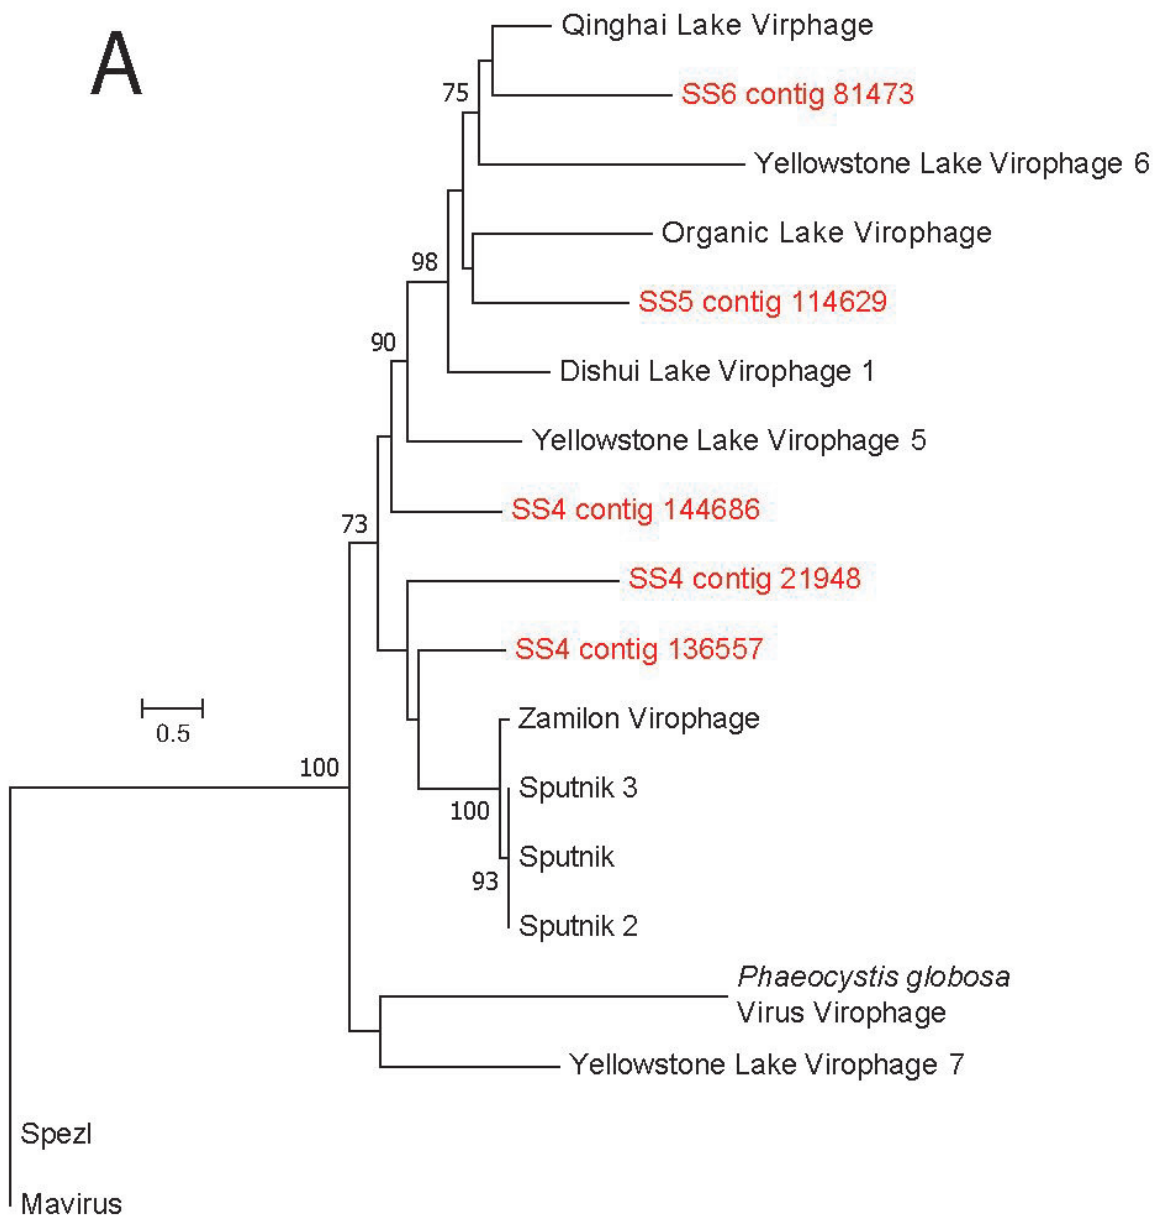**B**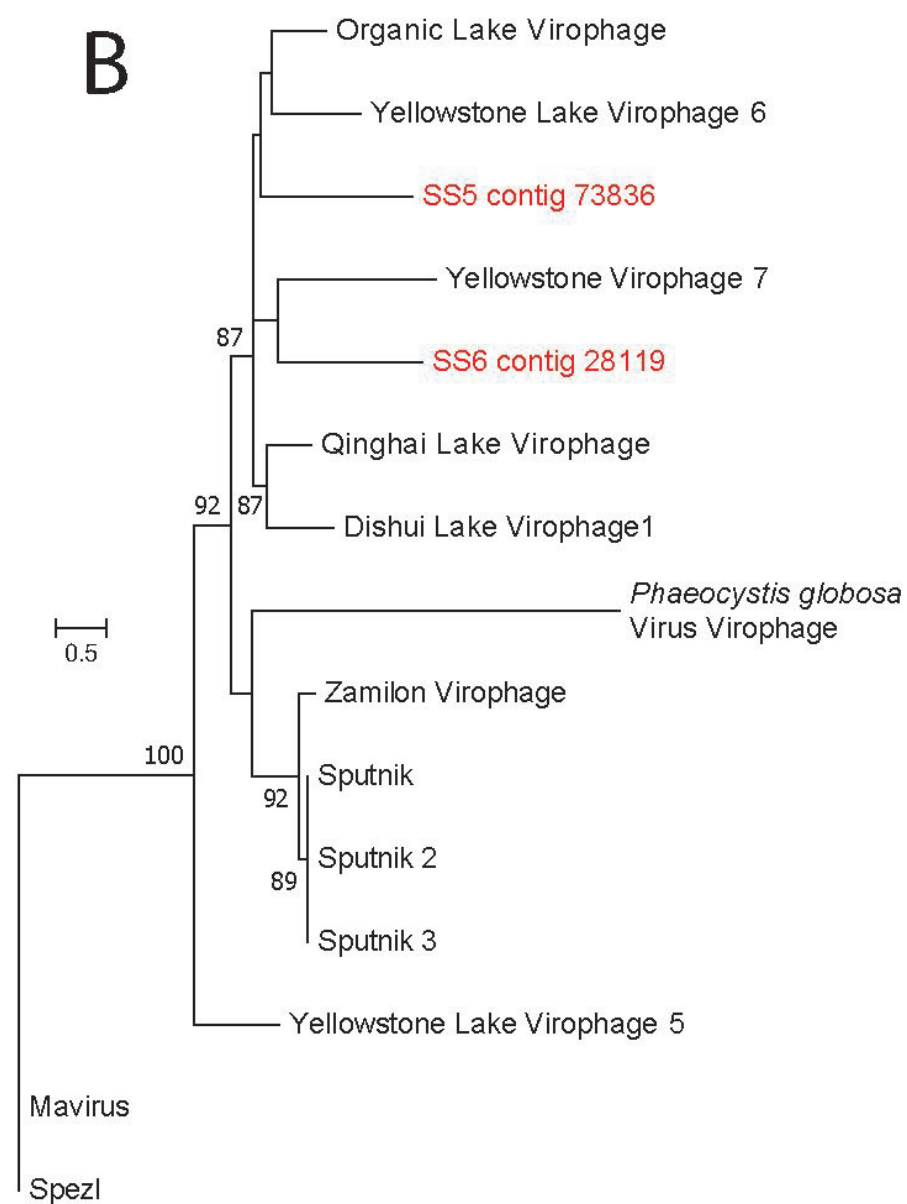

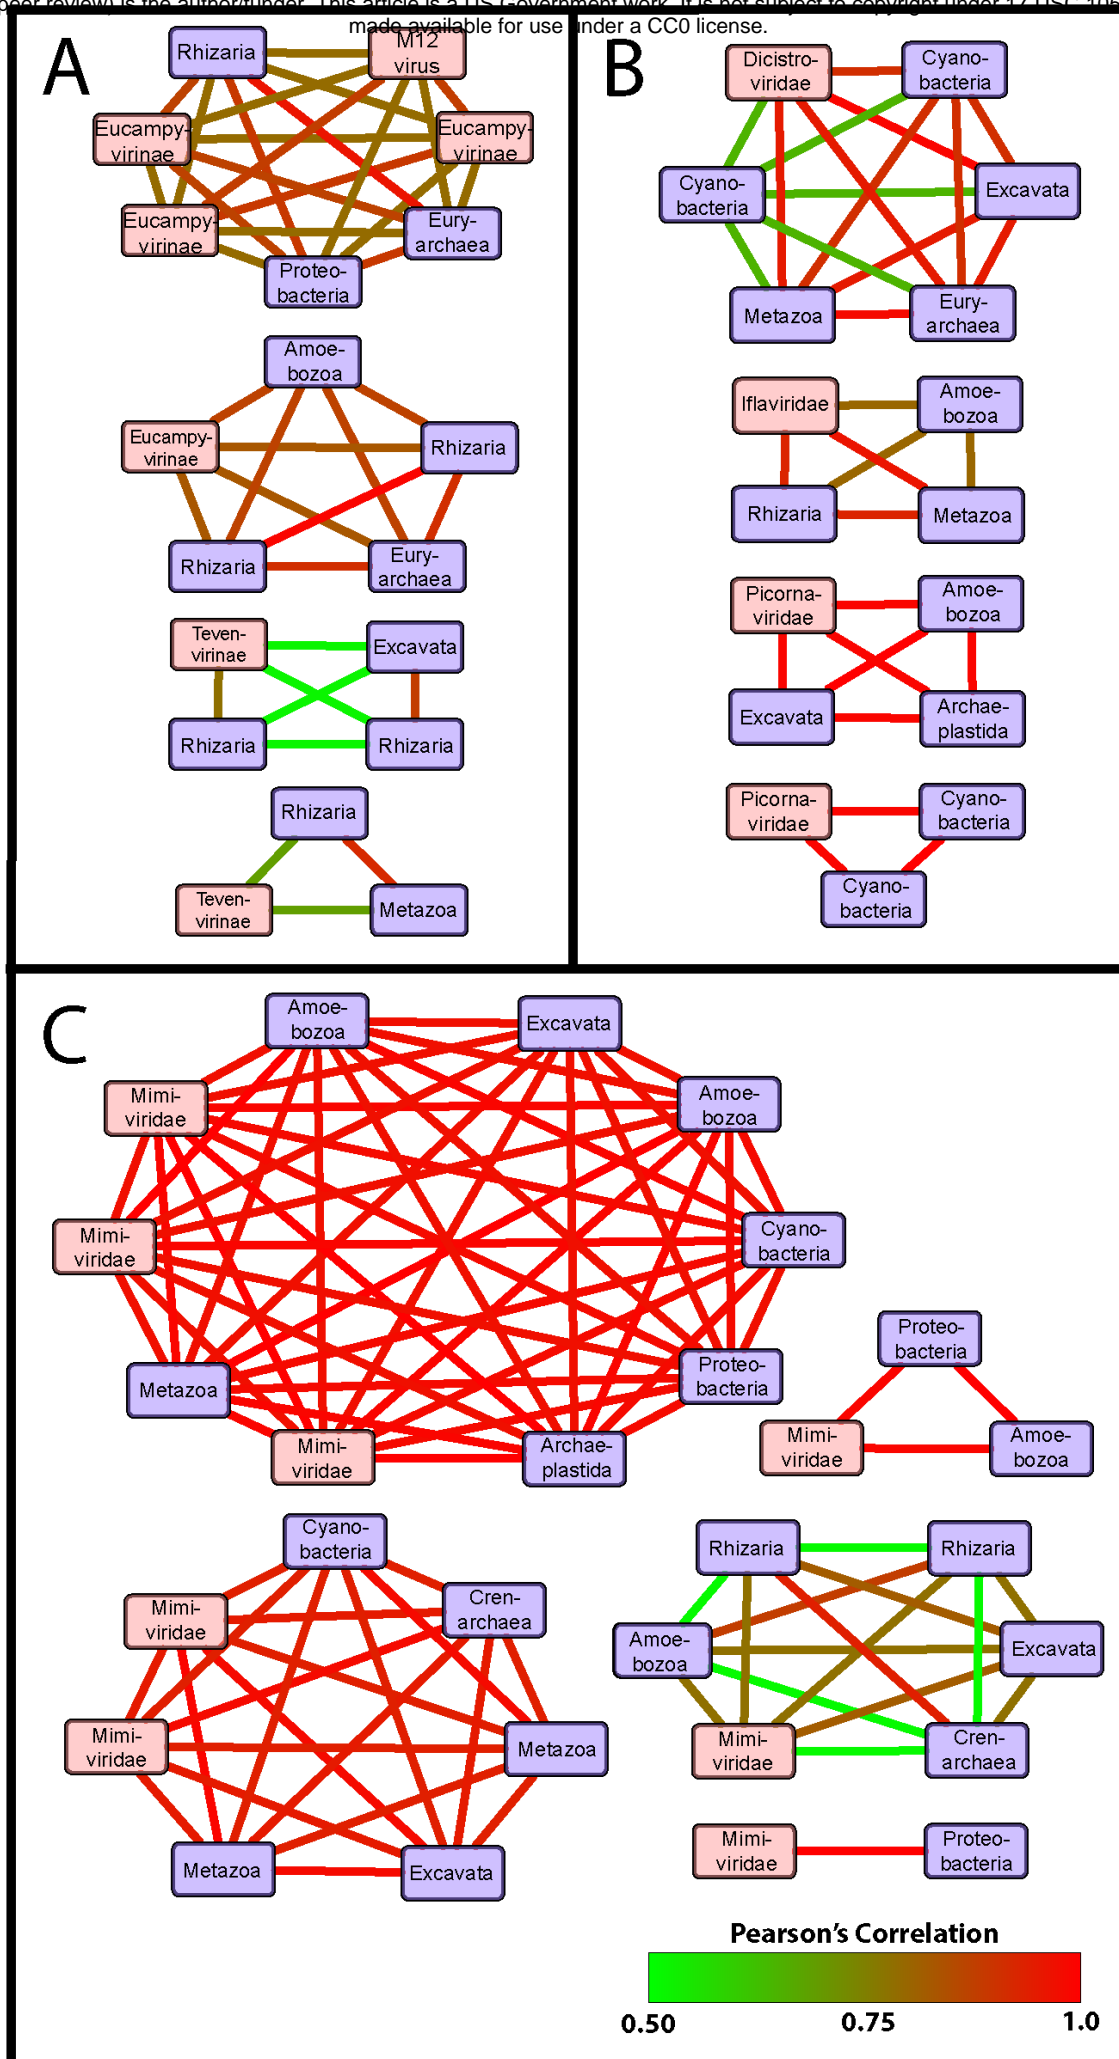

Source: https://www.biorxiv.org/content/10.1101/320002v1.full.pdf
